# Supplementary material
Source: PubMed Central journal article supplement (PMC7167342)
Supplement: NIHMS1554597-supplement-1.pdf [file NIHMS1554597-supplement-1.pdf]

731 **Supplemental Information**

732 **Predictors of Urinary and Blood Metal(loid) Concentrations among Pregnant Women in**  
 733 **Northern Puerto Rico**

734 Pahriya Ashrap, Deborah J. Watkins, Bhramar Mukherjee, Jonathan Boss, Michael J. Richards,  
 735 Zaira Rosario, Carmen M. Vélez-Vega, Akram Alshawabkeh, José F Cordero, John D. Meeker

736 **Table of Contents:**

|                                                                                                                                                                                                                                                                                       |           |
|---------------------------------------------------------------------------------------------------------------------------------------------------------------------------------------------------------------------------------------------------------------------------------------|-----------|
| Table S1. Demographic characteristics of n = 1,040 pregnant women from Puerto Rico (2011– 2017).                                                                                                                                                                                      | Page 3-4  |
| Table S2. Uncorrected urinary metal(loid) concentrations (ng/ml) in pregnant women from Puerto Rico (n = 660) from 2011– 2017 and comparison with U.S. population-based samples of women ages 18– 40 from NHANES.                                                                     | Page 5-6  |
| Table S3. Blood metal(loid) concentrations (ng/ml) in pregnant women from Puerto Rico (n = 824) from 2011– 2017 and comparison with U.S. population-based samples of women ages 18– 40 from NHANES.                                                                                   | Page 7    |
| Table S4. Geometric means of urinary (SG-corrected) and blood concentrations of metal(loid)s according to demographic, and maternal factors.                                                                                                                                          | Page 8    |
| Table S5. Frequencies of product use, dietary supplement intake, food consumption, and water use and sources in the 48-h recall questionnaire and geometric mean urinary (SG-corrected) and blood concentrations of metal(loid)s (ng/mL) associated with self-reported use or nonuse. | Page 9-11 |
| Table S6. Frequencies of selected food type consumption reported in second visit and sg-corrected urinary geometric mean concentrations of metal(loid) biomarkers (ng/ml).                                                                                                            | Page 12   |
| Table S7. Frequencies of selected food type consumption reported in second visit and geometric mean concentrations of metal(loid)s in blood (ng/ml) measured in third visit.                                                                                                          | Page 13   |
| Figure S1. SG-corrected urinary concentrations (ng/mL) of metal(loid)s by study visit (n=1285).                                                                                                                                                                                       | Page 14   |
| Figure S2. Blood concentrations (ng/mL) of metal(loid)s by study visit (n=1183).                                                                                                                                                                                                      | Page 15   |

|                                                                                                                                           |         |
|-------------------------------------------------------------------------------------------------------------------------------------------|---------|
| Figure S3. Metal(loid)s in urine/blood ratio by study visit (n=509).                                                                      | Page 16 |
| Figure S4. Distribution of urinary biomarker concentrations (ng/mL) among 660 pregnant women in Puerto Rico over study years (2011–2017). | Page 17 |
| Figure S5. Distribution of blood biomarker concentrations (ng/mL) among 824 pregnant women in Puerto Rico over study years (2011–2017).   | Page 18 |

737 Table S1. Demographic characteristics of n = 1,040 pregnant women from Puerto Rico (2011– 2017)  
 738

| variable                               | Mean (SD)                        |                 |
|----------------------------------------|----------------------------------|-----------------|
| maternal age                           | 26.7 (5.5)                       |                 |
| parity (# live births)                 | 0.7 (0.8)                        |                 |
| characteristic                         | category                         | count (percent) |
| Insurance type                         | private                          | 607 (58.4%)     |
|                                        | public (mi salud)                | 351 (33.8%)     |
|                                        | missing                          | 82 (7.9%)       |
| maternal education                     | <=high school/ged                | 214 (22.5%)     |
|                                        | some college or technical school | 359 (37.8%)     |
|                                        | college degree                   | 312 (32.8%)     |
|                                        | master's degree or higher        | 36 (3.8%)       |
|                                        | missing                          | 29 (3.1%)       |
|                                        | household income                 | <\$10,000       |
|                                        | ≥\$10,000 to <\$30,000           | 287 (27.6%)     |
|                                        | ≥\$30,000 to <\$50,000           | 207 (19.9%)     |
|                                        | ≥\$50,000                        | 117 (11.3%)     |
|                                        | missing                          | 163 (15.7%)     |
| marital status                         | single                           | 206 (19.8%)     |
|                                        | married or living together       | 801 (77%)       |
|                                        | missing                          | 33 (3.2%)       |
| gravidity (# pregnancies)              | 0                                | 415 (39.9%)     |
|                                        | 1                                | 363 (34.9%)     |
|                                        | >1                               | 229 (22%)       |
|                                        | missing                          | 33 (3.2%)       |
| prepregnancy BMI (kg m <sup>-2</sup> ) | ≤25                              | 535 (51.4%)     |
|                                        | >25 to ≤30                       | 309 (29.7%)     |
|                                        | >30                              | 166 (16%)       |

|                                 |                            |             |
|---------------------------------|----------------------------|-------------|
|                                 | missing                    | 30 (2.9%)   |
| smoke during pregnancy          | yes                        | 9 (1.1%)    |
|                                 | no                         | 787 (98.6%) |
| employment status               | unemployed                 | 626 (62.6%) |
|                                 | employed                   | 337 (33.7%) |
|                                 | missing                    | 37 (3.7%)   |
| smoking                         | never                      | 852 (81.9%) |
|                                 | ever                       | 144 (13.8%) |
|                                 | current                    | 12 (1.2%)   |
|                                 | missing                    | 32 (3.1%)   |
| exposure to second hand smoking | none                       | 860 (82.7%) |
|                                 | up to 1 hour               | 43(4.1%)    |
|                                 | more than 1 hour           | 66(6.3%)    |
| alcohol consumption             | missing                    | 71(6.8%)    |
|                                 | none                       | 511(49.1%)  |
|                                 | before pregnancy           | 434(41.7%)  |
|                                 | within the last few months | 59(5.7%)    |
|                                 | missing                    | 36(3.5%)    |

739

740

741

742

743

744

745

746

747

748

749

750

751

752 Table S2. Uncorrected urinary biomarker concentrations (ng/ml) in n = 660 pregnant women from Puerto Rico<sup>a</sup> in 2011– 2017 and  
 753 comparison with U.S. population-based samples of women ages 18– 40 from NHANES.<sup>b,c</sup>  
 754

|           | <b>Cohort</b> | <b>N<br/>(Sample)</b> | <b>LOD</b>  | <b>%<br/>&gt;LOD</b> | <b>GM</b> | <b>GSD</b> | <b>25%</b> | <b>50%</b> | <b>75%</b> | <b>95%</b> | <b>P value<sup>d</sup></b> |
|-----------|---------------|-----------------------|-------------|----------------------|-----------|------------|------------|------------|------------|------------|----------------------------|
| <b>As</b> | PROTECT       | 1285                  | 0.3         | 100                  | 10.9      | 2.5        | 6.1        | 10.8       | 19.0       | 46.4       | <0.01**                    |
|           | NHANES        | 1562                  | 0.26-1.25   | 97.6                 | 7.3       | 3.2        | 3.3        | 6.4        | 13.3       | 62.3       |                            |
| <b>Ba</b> | PROTECT       | 1285                  | 0.1         | 99.3                 | 2.5       | 2.9        | 1.3        | 2.5        | 5.0        | 12.9       | <0.01**                    |
|           | NHANES        | 1561                  | 0.06-0.12   | 99.5                 | 1.1       | 2.8        | 0.58       | 1.1        | 2.3        | 5.6        |                            |
| <b>Cd</b> | PROTECT       | 1285                  | 0.06        | 74.5                 | 0.12      | 2.3        | 0.06       | 0.12       | 0.20       | 0.58       | <0.01**                    |
|           | NHANES        | 1561                  | 0.036-0.056 | 85.7                 | 0.14      | 2.8        | 0.06       | 0.15       | 0.28       | 0.75       |                            |
| <b>Co</b> | PROTECT       | 1285                  | 0.05        | 100                  | 1.0       | 1.9        | 0.70       | 1.0        | 1.5        | 2.8        | <0.01**                    |
|           | NHANES        | 1561                  | 0.023-0.048 | 99.6                 | 0.44      | 2.5        | 0.25       | 0.41       | 0.81       | 1.8        |                            |
| <b>Cs</b> | PROTECT       | 1285                  | 0.01        | 100                  | 4.9       | 1.7        | 3.7        | 5.3        | 7.1        | 10.7       | <0.01**                    |
|           | NHANES        | 1561                  | 0.066-0.12  | 100                  | 3.8       | 2.1        | 2.3        | 4.1        | 6.4        | 11.4       |                            |
| <b>Cu</b> | PROTECT       | 1285                  | 2.5         | 99.3                 | 14.0      | 1.8        | 10.0       | 14.2       | 19.5       | 34.5       |                            |
|           | NHANES        |                       |             |                      |           |            |            |            |            |            |                            |
| <b>Hg</b> | PROTECT       | 1285                  | 0.05        | 98.6                 | 0.60      | 2.9        | 0.30       | 0.59       | 1.2        | 3.6        | <0.01**                    |
|           | NHANES        | 1565                  | 0.05-0.13   | 69.7                 | 0.28      | 2.9        | <LOD       | 0.25       | 0.55       | 1.8        |                            |
| <b>Mn</b> | PROTECT       | 1285                  | 0.08        | 100                  | 1.2       | 1.6        | 0.95       | 1.2        | 1.6        | 2.3        | <0.01**                    |
|           | NHANES        | 1131                  | 0.08-0.13   | 42.8                 | 0.12      | 1.8        | <LOD       | <LOD       | 0.16       | 0.34       |                            |
| <b>Mo</b> | PROTECT       | 1285                  | 0.3         | 100                  | 58.9      | 2.0        | 38.9       | 62.9       | 92.2       | 166        | <0.01**                    |
|           | NHANES        | 1560                  | 0.8-0.99    | 100                  | 36.1      | 2.5        | 19.6       | 39.4       | 69.8       | 139        |                            |
| <b>Ni</b> | PROTECT       | 1285                  | 0.8         | 98.9                 | 5.4       | 2.0        | 3.5        | 5.5        | 8.5        | 15.5       |                            |
|           | NHANES        |                       |             |                      |           |            |            |            |            |            |                            |
| <b>Pb</b> | PROTECT       | 1285                  | 0.1         | 72.1                 | 0.25      | 2.7        | <LOD       | 0.27       | 0.51       | 1.2        | 0.11                       |
|           | NHANES        | 1561                  | 0.03-0.10   | 96.2                 | 0.27      | 2.5        | 0.15       | 0.27       | 0.48       | 1.2        |                            |
| <b>Sb</b> | PROTECT       | 1285                  | 0.04        | 90                   | 0.09      | 1.9        | 0.06       | 0.08       | 0.12       | 0.22       | <0.01**                    |

|           |         |      |             |       |      |     |      |      |      |      |         |
|-----------|---------|------|-------------|-------|------|-----|------|------|------|------|---------|
|           | NHANES  | 1561 | 0.022-0.041 | 69.4  | 0.05 | 2.3 | <LOD | 0.05 | 0.08 | 0.21 |         |
| <b>Sn</b> | PROTECT | 1285 | 0.1         | 100.0 | 2.1  | 3.0 | 1.0  | 1.9  | 4.0  | 14.0 | <0.01** |
|           | NHANES  | 1130 | 0.09-0.22   | 86.2  | 0.43 | 3.2 | 0.18 | 0.38 | 0.88 | 3.3  |         |
| <b>Zn</b> | PROTECT | 1285 | 2           | 100   | 266  | 2.5 | 155  | 300  | 498  | 947  |         |
|           | NHANES  |      |             |       |      |     |      |      |      |      |         |

755

756

757

758

759

760

761

762

763

764

765

766

767

768

769

770

771

772

773

774

775

776

777

778

779

780

781

782

<sup>a</sup> Includes biomarker concentrations for up to 3 repeated samples per woman (n = 1,285 samples); <sup>b</sup> Females 18–40 years of age; n = 1,604 for biomarkers measured in 2009-2010, 2011-2012, 2013-2014, and 2015-2016 NHANES; <sup>c</sup> NHANES, National Health and Nutrition Examination Survey; LOD, limit of detection; GM, geometric mean, GSD, geometric standard deviation; <sup>d</sup> P value for two sample t-test comparing geometric mean of chemical concentration in two cohorts; \*\*P <0.01

783 Table S3. Blood biomarker concentrations (ng/ml) in n = 842 pregnant women from Puerto Rico<sup>a</sup> in 2011– 2017 and comparison with  
 784 U.S. population-based samples of women ages 18– 40 from NHANES.<sup>b,c</sup>  
 785

|           | Cohort  | N (Sample) | LOD       | % >LOD | GM   | GSD | 25%  | 50%  | 75%  | 95%  | P value <sup>d</sup> |
|-----------|---------|------------|-----------|--------|------|-----|------|------|------|------|----------------------|
| <b>As</b> | PROTECT | 1183       | 0.3       | 48.9   | 0.34 | 1.8 | 0.21 | 0.21 | 0.48 | 1.0  |                      |
|           | NHANES  |            |           |        |      |     |      |      |      |      |                      |
| <b>Cd</b> | PROTECT | 1183       | 0.1       | 60.9   | 0.12 | 1.7 | 0.07 | 0.12 | 0.16 | 0.27 | <0.01**              |
|           | NHANES  | 3393       | 0.1-0.16  | 83.0   | 0.31 | 2.2 | 0.17 | 0.28 | 0.48 | 1.4  |                      |
| <b>Co</b> | PROTECT | 1183       | 0.2       | 98.2   | 0.34 | 1.4 | 0.28 | 0.34 | 0.41 | 0.57 |                      |
|           | NHANES  |            |           |        |      |     |      |      |      |      |                      |
| <b>Cs</b> | PROTECT | 1183       | 0.04      | 99.9   | 1.1  | 1.4 | 0.94 | 1.2  | 1.4  | 1.9  |                      |
|           | NHANES  |            |           |        |      |     |      |      |      |      |                      |
| <b>Cu</b> | PROTECT | 1183       | 9         | 99.9   | 1552 | 1.3 | 1393 | 1562 | 1740 | 2096 |                      |
|           | NHANES  |            |           |        |      |     |      |      |      |      |                      |
| <b>Hg</b> | PROTECT | 1183       | 0.2       | 99.9   | 1.2  | 1.7 | 0.85 | 1.2  | 1.7  | 3.0  | <0.01**              |
|           | NHANES  | 3393       | 0.16-0.28 | 87.9   | 0.74 | 2.5 | 0.37 | 0.67 | 1.4  | 4.0  |                      |
| <b>Mn</b> | PROTECT | 1183       | 2         | 99.9   | 11.3 | 1.4 | 9.0  | 11.3 | 14.0 | 19.4 | <0.01**              |
|           | NHANES  | 2174       | 0.99-1.06 | 100.0  | 10.7 | 1.4 | 8.4  | 10.6 | 13.6 | 19.2 |                      |
| <b>Ni</b> | PROTECT | 1183       | 0.5       | 96.4   | 1.0  | 1.6 | 0.81 | 1.0  | 1.3  | 2.2  |                      |
|           | NHANES  |            |           |        |      |     |      |      |      |      |                      |
| <b>Pb</b> | PROTECT | 1183       | 0.02      | 99.9   | 3.3  | 1.6 | 2.5  | 3.3  | 4.3  | 6.4  | <0.01**              |
|           | NHANES  | 3393       | 0.7-2.5   | 98.8   | 6.4  | 1.8 | 4.4  | 6.1  | 9.0  | 16.9 |                      |
| <b>Zn</b> | PROTECT | 1183       | 24        | 99.9   | 4682 | 1.3 | 4248 | 4752 | 5252 | 6055 |                      |
|           | NHANES  |            |           |        |      |     |      |      |      |      |                      |

786  
 787 <sup>a</sup> Includes biomarker concentrations for up to 2 repeated samples per woman (n = 1,183 samples); <sup>b</sup> Females 18–40 years of age; n = 3,585 for  
 788 biomarkers measured in 2009-2010, 2011-2012, 2013-2014, and 2015-2016 NHANES; <sup>c</sup> NHANES, National Health and Nutrition Examination  
 789 Survey; LOD, limit of detection; GM, geometric mean, GSD, geometric standard deviation; <sup>d</sup> P value for two sample t-test comparing geometric  
 790 mean of chemical concentration in two cohorts; \*\*P <0.01

791 Table S4. Geometric means of urinary (SG-corrected) and blood concentrations of metal(loid)s according to demographic, and  
 792 maternal factors<sup>ab</sup>.  
 793

| Variable                              | Urinary metal(loid)s |                    |                    |                    |     |                    | Blood metal(loid)s |                    |                    |                    |                    |                |
|---------------------------------------|----------------------|--------------------|--------------------|--------------------|-----|--------------------|--------------------|--------------------|--------------------|--------------------|--------------------|----------------|
|                                       | As                   | Cd                 | Co                 | Cs                 | Mo  | Sb                 | Cd                 | Cu                 | Hg                 | Mn                 | Pb                 | Zn             |
| overall                               | 10.9                 | 0.12               | 1.0                | 4.9                | 1.2 | 0.09               | 0.12               | 1552               | 1.2                | 11.3               | 3.3                | 4682           |
| maternal age (years)                  |                      |                    |                    |                    |     |                    |                    |                    |                    |                    |                    |                |
| <25                                   |                      | 0.11               |                    | 5.0                |     | 0.10               | 0.11               |                    | 1.1                |                    |                    |                |
| 25-30                                 |                      | 0.13               |                    | 5.4                |     | 0.09               | 0.11               |                    | 1.3                |                    |                    |                |
| >30                                   |                      | 0.17               |                    | 5.8                |     | 0.09               | 0.13               |                    | 1.3                |                    |                    |                |
| p value                               |                      | <b>&lt;0.001**</b> |                    | <b>&lt;0.001**</b> |     | <b>&lt;0.001**</b> | <b>0.02**</b>      |                    | <b>&lt;0.001**</b> |                    |                    |                |
| maternal education                    |                      |                    |                    |                    |     |                    |                    |                    |                    |                    |                    |                |
| <=high school/ged                     |                      |                    |                    | 4.8                |     | 0.10               |                    |                    | 1.1                | 11.7               | 4.05               |                |
| some college or technical school      |                      |                    |                    | 5.3                |     | 0.10               |                    |                    | 1.2                | 11.4               | 3.20               |                |
| college degree                        |                      |                    |                    | 5.6                |     | 0.08               |                    |                    | 1.3                | 10.9               | 2.99               |                |
| master's degree or higher             |                      |                    |                    | 5.7                |     | 0.08               |                    |                    | 1.5                | 11.0               | 3.28               |                |
| p value                               |                      |                    |                    | <b>&lt;0.001**</b> |     | <b>&lt;0.001**</b> |                    |                    | <b>&lt;0.001**</b> | <b>0.01**</b>      | <b>&lt;0.001**</b> |                |
| parity (# pregnancies)                |                      |                    |                    |                    |     |                    |                    |                    |                    |                    |                    |                |
| 0                                     |                      | 0.12               |                    |                    |     |                    | 0.11               | 1516               |                    | 10.8               | 3.09               |                |
| 1                                     |                      | 0.13               |                    |                    |     |                    | 0.11               | 1589               |                    | 11.3               | 3.34               |                |
| >1                                    |                      | 0.14               |                    |                    |     |                    | 0.13               | 1560               |                    | 12.2               | 3.75               |                |
| p value                               |                      | <b>0.003**</b>     |                    |                    |     |                    | <b>0.01**</b>      | <b>0.03**</b>      |                    | <b>&lt;0.001**</b> | <b>&lt;0.001**</b> |                |
| prepregnancy BMI (kg/m <sup>2</sup> ) |                      |                    |                    |                    |     |                    |                    |                    |                    |                    |                    |                |
| ≤25                                   |                      | 0.12               |                    |                    |     |                    | 0.12               | 1477               |                    | 10.9               |                    | 4585           |
| >25 to ≤30                            |                      | 0.14               |                    |                    |     |                    | 0.12               | 1603               |                    | 11.7               |                    | 4759           |
| >30                                   |                      | 0.14               |                    |                    |     |                    | 0.10               | 1684               |                    | 11.6               |                    | 4825           |
| p value                               |                      | <b>0.004**</b>     |                    |                    |     |                    | <b>&lt;0.001**</b> | <b>&lt;0.001**</b> |                    | <b>0.01**</b>      |                    | <b>0.005**</b> |
| smoking                               |                      |                    |                    |                    |     |                    |                    |                    |                    |                    |                    |                |
| never                                 |                      |                    | 1.1                |                    |     |                    | 0.11               |                    |                    |                    | 3.23               |                |
| ever                                  |                      |                    | 1.2                |                    |     |                    | 0.13               |                    |                    |                    | 3.75               |                |
| current                               |                      |                    | 0.9                |                    |     |                    | 0.25               |                    |                    |                    | 4.21               |                |
| p value (ever vs never)               |                      |                    | <b>&lt;0.001**</b> |                    |     |                    | <b>&lt;0.001**</b> |                    |                    |                    | <b>0.001**</b>     |                |
| p value (current vs never)            |                      |                    |                    |                    |     |                    | <b>&lt;0.001**</b> |                    |                    |                    |                    |                |

794 <sup>a</sup> Results shown for food items with association detected; <sup>b</sup> p-values from linear mixed effects models accounting for within-person correlations;

795 \*P from 0.1 to 0.05, \*\*P <0.05



796 Table S5. Frequencies of product use, dietary supplement intake, food consumption, and water use and sources in the 48-h recall questionnaire and  
 797 geometric mean urinary (SG-corrected) and blood concentrations of metal(loid)s (ng/mL) associated with self-reported use or non-use<sup>ab</sup>.  
 798  
 799

| Variable           | Use | Urinary metal(loid)s |                      |               |              |               |                    |               |              | Blood metal(loid)s  |                      |      |               |               |                    |                    |                |
|--------------------|-----|----------------------|----------------------|---------------|--------------|---------------|--------------------|---------------|--------------|---------------------|----------------------|------|---------------|---------------|--------------------|--------------------|----------------|
|                    |     | n <sup>c</sup> =660  | N <sup>d</sup> =1285 | As            | Cd           | Co            | Cs                 | Mo            | Sb           | n <sup>c</sup> =842 | N <sup>d</sup> =1183 | Cd   | Cu            | Hg            | Mn                 | Pb                 | Zn             |
| <b>Products</b>    |     |                      |                      |               |              |               |                    |               |              |                     |                      |      |               |               |                    |                    |                |
| cosmetic           | yes | 435                  | 845                  |               |              |               |                    |               | 0.09         | 568                 | 787                  |      | 1531          | 1.3           | 11.0               | 3.2                |                |
|                    | no  | 146                  | 308                  |               |              |               |                    |               | 0.10         | 185                 | 259                  |      | 1604          | 1.1           | 11.7               | 3.6                |                |
| p value            |     |                      |                      |               |              |               |                    |               | <b>0.01*</b> |                     |                      |      | <b>0.01**</b> | <b>0.02**</b> | <b>0.01**</b>      | <b>0.01**</b>      |                |
| perfume            | yes | 484                  | 965                  | 11.5          | <b>0.13</b>  | 1.1           |                    | 62.7          |              | 628                 | 868                  |      |               |               |                    |                    |                |
|                    | no  | 97                   | 188                  | 13.1          | <b>0.12</b>  | 1.2           |                    | 69.9          |              | 124                 | 176                  |      |               |               |                    |                    |                |
| p value            |     |                      |                      | <b>0.05*</b>  | <b>0.05*</b> | <b>0.04**</b> |                    | <b>0.02**</b> |              |                     |                      |      |               |               |                    |                    |                |
| shaving cream      | yes | 48                   | 94                   |               |              | 1.1           | 5.5                |               |              | 67                  | 90                   |      | 1471          | 1.2           |                    |                    |                |
|                    | no  | 533                  | 1060                 |               |              | 1.1           | 5.4                |               |              | 687                 | 957                  |      | 1556          | 1.2           |                    |                    |                |
| p value            |     |                      |                      |               |              | 0.77          | 0.93               |               |              |                     |                      |      | 0.16          | 0.23          |                    |                    |                |
| shampoo            | yes | 409                  | 815                  |               |              |               |                    |               |              | 541                 | 743                  |      |               |               | 11.0               |                    |                |
|                    | no  | 172                  | 338                  |               |              |               |                    |               |              | 213                 | 302                  |      |               |               | 11.6               |                    |                |
| p value            |     |                      |                      |               |              |               |                    |               |              |                     |                      |      |               |               | 0.10               |                    |                |
| hairspray          | yes | 196                  | 395                  |               |              |               |                    |               | 0.10         | 243                 | 337                  |      |               |               |                    |                    |                |
|                    | no  | 384                  | 759                  |               |              |               |                    |               | 0.09         | 507                 | 705                  |      |               |               |                    |                    |                |
| p value            |     |                      |                      |               |              |               |                    |               | 0.12         |                     |                      |      |               |               |                    |                    |                |
| other hair product | yes | 81                   | 81                   | 10.2          |              | 1.0           |                    |               |              | 109                 | 112                  |      | 1457          |               | 10.1               | 3.1                | 4366           |
|                    | no  | 499                  | 1073                 | 11.9          |              | 1.1           |                    |               |              | 645                 | 934                  |      | 1560          |               | 11.3               | 3.3                | 4716           |
| p value            |     |                      |                      | 0.21          |              | <b>0.06*</b>  |                    |               |              |                     |                      |      | <b>0.01**</b> |               | <b>&lt;0.001**</b> | <b>0.01**</b>      | <b>0.002**</b> |
| store pesticide    | yes | 342                  | 668                  | 11.1          |              |               |                    |               |              | 467                 | 643                  |      |               |               | 10.9               | 3.1                |                |
|                    | no  | 238                  | 483                  | 12.7          |              |               |                    |               |              | 285                 | 401                  |      |               |               | 11.5               | 3.6                |                |
| p value            |     |                      |                      | <b>0.01**</b> |              |               |                    |               |              |                     |                      |      |               |               | <b>0.004**</b>     | <b>&lt;0.001**</b> |                |
| <b>Food items</b>  |     |                      |                      |               |              |               |                    |               |              |                     |                      |      |               |               |                    |                    |                |
| milk               | yes | 485                  | 979                  |               |              | <b>1.1</b>    | <b>5.5</b>         |               |              | 622                 | 873                  |      |               |               |                    |                    |                |
|                    | no  | 96                   | 174                  |               |              | <b>1.0</b>    | <b>4.7</b>         |               |              | 133                 | 175                  |      |               |               |                    |                    |                |
| p value            |     |                      |                      |               |              | <b>0.02**</b> | <b>&lt;0.001**</b> |               |              |                     |                      |      |               |               |                    |                    |                |
| meat               | yes | 360                  | 729                  |               |              |               |                    |               |              | 470                 | 654                  | 0.12 |               |               |                    |                    |                |
|                    | no  | 221                  | 424                  |               |              |               |                    |               |              | 285                 | 394                  | 0.11 |               |               |                    |                    |                |

|                    |         |                                         |      |              |      |            |       |      |      |      |      |
|--------------------|---------|-----------------------------------------|------|--------------|------|------------|-------|------|------|------|------|
| p value            |         | <b>0.01**</b>                           |      |              |      |            |       |      |      |      |      |
| fish               | yes     | 106                                     | 211  | <b>14.99</b> |      | 59.3       | 144   | 182  |      | 1485 | 1.5  |
|                    | no      | 475                                     | 942  | <b>11.11</b> |      | 64.8       | 611   | 866  |      | 1563 | 1.2  |
| p value            |         | <b>&lt;0.001**</b>                      |      |              |      |            |       |      |      |      |      |
| cold cuts          | yes     | 360                                     | 719  | 11.2         | 0.13 |            | 476   | 663  |      |      | 11.2 |
|                    | no      | 221                                     | 433  | 12.7         | 0.14 |            | 279   | 385  |      |      | 11.0 |
| p value            |         | <b>0.04** 0.05*</b>                     |      |              |      |            |       |      |      |      |      |
| peanut butter      | yes     | 45                                      | 101  |              |      | <b>1.2</b> | 69.1  | 64   | 90   |      |      |
|                    | no      | 535                                     | 1051 |              |      | <b>1.1</b> | 63.3  | 690  | 957  |      |      |
| p value            |         | <b>0.04**</b>                           |      |              |      |            |       |      |      |      |      |
| can foods          | yes     | 303                                     | 601  |              |      |            |       | 393  | 557  |      | 1.3  |
|                    | no      | 277                                     | 551  |              |      |            |       | 362  | 491  |      | 1.1  |
| p value            |         | <b>&lt;0.001*</b>                       |      |              |      |            |       |      |      |      |      |
| spinach            | yes     | 35                                      | 69   |              |      | 6.1        |       | 46   | 57   |      |      |
|                    | no      | 545                                     | 1083 |              |      | 5.3        |       | 709  | 991  |      |      |
| p value            |         | <b>0.01**</b>                           |      |              |      |            |       |      |      |      |      |
| tomatoes           | yes     | 218                                     | 442  |              |      |            |       | 293  | 409  | 0.12 | 1.3  |
|                    | no      | 362                                     | 710  |              |      |            |       | 462  | 639  | 0.11 | 1.2  |
| p value            |         | <b>0.02** 0.01**</b>                    |      |              |      |            |       |      |      |      |      |
| collard            | yes     | 42                                      | 72   |              |      |            |       | 31   | 40   | 0.14 |      |
|                    | no      | 538                                     | 1080 |              |      |            |       | 724  | 1008 | 0.12 |      |
| p value            |         | <b>0.01**</b>                           |      |              |      |            |       |      |      |      |      |
| <b>Supplements</b> |         |                                         |      |              |      |            |       |      |      |      |      |
| folic acid         | yes     | 172                                     | 344  |              |      | 1.2        | 5.7   | 67.4 | 0.10 | 213  | 298  |
|                    | no      | 434                                     | 864  |              |      | 1.1        | 5.2   | 62.3 | 0.09 | 606  | 856  |
| p value            |         | <b>0.05* &lt;0.001** 0.03** 0.001**</b> |      |              |      |            |       |      |      |      |      |
| multi-vitamin      | yes     | 570                                     | 1145 |              | 0.13 |            |       |      |      | 775  | 1089 |
|                    | no      | 38                                      | 68   |              | 0.15 |            |       |      |      | 45   | 66   |
| p value            |         | <b>0.27 0.19</b>                        |      |              |      |            |       |      |      |      |      |
| iron supplement    | yes     | 36                                      | 64   |              |      |            | 73.07 |      | 36   | 48   |      |
|                    | no      | 569                                     | 1142 |              |      |            | 63.19 |      | 779  | 1101 |      |
| p value            |         | <b>0.06*</b>                            |      |              |      |            |       |      |      |      |      |
| <b>Water usage</b> |         |                                         |      |              |      |            |       |      |      |      |      |
| water source       | bottled | 236                                     | 479  |              |      | 5.7        |       |      |      | 361  | 507  |
|                    |         |                                         |      |              |      |            |       |      |      | 3.0  |      |

|                                     |                   |     |     |                |     |     |                    |
|-------------------------------------|-------------------|-----|-----|----------------|-----|-----|--------------------|
| for drinking <b>a</b>               | public            | 382 | 742 | 5.2            | 446 | 629 | 3.6                |
| p value                             |                   |     |     | <b>0.001**</b> |     |     | <b>&lt;0.001**</b> |
| water treatment                     | yes               | 147 | 299 |                | 162 | 231 | 10.7               |
|                                     | no                | 471 | 923 |                | 650 | 913 | 11.3               |
| p value                             |                   |     |     |                |     |     | <b>0.04**</b>      |
| water filtration frequency <b>b</b> | ~ never           | 235 | 469 | 65.7           | 289 | 398 |                    |
|                                     | ~ 1/4 of the time | 51  | 97  | 61.2           | 60  | 86  |                    |
|                                     | ~ 1/2 of the time | 51  | 93  | 60.3           | 66  | 99  |                    |
|                                     | ~ 3/4 of the time | 22  | 42  | 63.3           | 59  | 80  |                    |
|                                     | always            | 247 | 496 | 62.6           | 327 | 465 |                    |
| p value (yes/no)                    |                   |     |     | 0.13           |     |     |                    |
| cistern material <b>c</b>           | plastic           | 193 | 370 | 0.12           | 211 | 307 |                    |
|                                     | metal             | 10  | 18  | 0.16           | 12  | 18  |                    |
|                                     | other             | 13  | 32  | 0.13           | 14  | 21  |                    |
| p value                             |                   |     |     | <b>0.02**</b>  |     |     |                    |

800 <sup>a</sup> Results shown for food items with association detected; <sup>b</sup> p-values are from linear mixed effects models accounting for within-person correlations: \*P from 0.1 to  
801 0.05, \*\*P <0.05; <sup>c</sup> number of participants; <sup>d</sup> N number of samples

802  
803  
804  
805  
806  
807  
808  
809  
810  
811  
812  
813  
814  
815  
816  
817  
818

819 Table S6. Frequencies of selected food type consumption reported in second visit and sg-corrected urinary geometric mean concentrations of  
 820 metal(loid) biomarkers (ng/ml) associated with self-reported frequency<sup>a</sup>.  
 821

| Food Item            | Frequency category    | n <sup>c</sup> | As            | Ba   | Cd            | Co           | Cs   | Cu   | Hg   | Mn   | Mo   | Ni   | Pb            | Sb   | Sn   | Zn           |
|----------------------|-----------------------|----------------|---------------|------|---------------|--------------|------|------|------|------|------|------|---------------|------|------|--------------|
| fish                 | Never                 | 22             | 11.3          | 2.9  | 0.22          | 1.3          | 5.2  | 14.8 | 0.63 | 1.2  | 76.9 | 5.9  | 0.34          | 0.10 | 2.0  | 349          |
|                      | <1 per month          | 46             | 11.7          | 2.8  | 0.13          | 1.1          | 5.5  | 14.7 | 0.66 | 1.4  | 73.0 | 6.5  | 0.29          | 0.09 | 2.5  | 272          |
|                      | 1 per month           | 44             | 10.5          | 3.0  | 0.14          | 1.3          | 5.6  | 15.2 | 0.60 | 1.3  | 65.9 | 6.6  | 0.25          | 0.09 | 2.6  | 236          |
|                      | 2–3 per month         | 55             | 11.6          | 2.5  | 0.12          | 1.1          | 5.2  | 13.5 | 0.59 | 1.3  | 57.4 | 5.9  | 0.26          | 0.09 | 1.9  | 245          |
|                      | 1 per week            | 12             | 12.3          | 3.0  | 0.08          | 1.1          | 5.7  | 18.8 | 0.94 | 1.3  | 67.5 | 8.8  | 0.18          | 0.08 | 4.3  | 248          |
|                      | 3–4 per week and more | 13             | 16.6          | 2.5  | 0.1           | 1.0          | 5.4  | 14.6 | 0.44 | 1.2  | 76.2 | 5.4  | 0.20          | 0.09 | 1.9  | 400          |
| P value <sup>b</sup> |                       |                | 0.20          | 0.61 | <b>0.02**</b> | <b>0.06*</b> | 0.96 | 0.95 | 0.51 | 0.62 | 0.37 | 0.90 | <b>0.04**</b> | 0.52 | 0.89 | 0.90         |
| rice                 | 2–3 per month or less | 19             | 8.7           | 2.9  | 0.12          | 1.1          | 4.9  | 13.9 | 0.72 | 1.4  | 60.6 | 5.6  | 0.29          | 0.09 | 2.1  | 257          |
|                      | 1 per week            | 11             | 10.5          | 2.2  | 0.08          | 1.1          | 5.3  | 12.0 | 0.49 | 1.3  | 57.3 | 5.4  | 0.23          | 0.09 | 1.9  | 185          |
|                      | 2 per week            | 25             | 11.2          | 3.3  | 0.23          | 1.3          | 5.7  | 14.6 | 0.73 | 1.2  | 67.3 | 6.2  | 0.20          | 0.07 | 2.0  | 240          |
|                      | 3–4 per week          | 65             | 10.5          | 2.6  | 0.12          | 1.2          | 5.9  | 15.7 | 0.52 | 1.4  | 65.4 | 7.4  | 0.23          | 0.10 | 2.5  | 288          |
|                      | 5-6 per week          | 30             | 15.2          | 2.7  | 0.14          | 1.0          | 5.4  | 15.0 | 0.80 | 1.3  | 74.1 | 5.6  | 0.30          | 0.09 | 2.6  | 253          |
|                      | 1 per day and more    | 37             | 13.4          | 3.5  | 0.15          | 1.2          | 4.8  | 14.5 | 0.58 | 1.2  | 69.3 | 6.4  | 0.37          | 0.10 | 2.6  | 332          |
| P value <sup>b</sup> |                       |                | <b>0.02**</b> | 0.50 | 0.55          | 0.77         | 0.65 | 0.51 | 0.83 | 0.35 | 0.25 | 0.57 | <b>0.09*</b>  | 0.20 | 0.27 | <b>0.09*</b> |

822  
 823 <sup>a</sup> Results shown for food items with association detected; <sup>b</sup> p-values are from linear mixed effects models accounting for within-person correlations: \*P from 0.1 to  
 824 0.05, \*\*P <0.05; <sup>c</sup> n=449 for total number of participants in second visit  
 825

826  
 827  
 828  
 829  
 830  
 831  
 832  
 833  
 834  
 835

836 Table S7. Frequencies of selected food type consumption reported in second visit and blood geometric mean concentrations of metal(loid)  
 837 biomarkers (ng/ml) measured in third visit associated with self-reported frequency<sup>a</sup>  
 838  
 839

| Food item            | Frequency category    | n <sup>c</sup> | As            | Cd            | Co   | Cs                | Cu   | Hg                | Mn   | Ni   | Pb   | Zn   |
|----------------------|-----------------------|----------------|---------------|---------------|------|-------------------|------|-------------------|------|------|------|------|
| Meat                 | <1 per month          | 40             | 0.40          | 0.11          | 0.38 | 1.0               | 1614 | 1.3               | 12.3 | 1.1  | 3.3  | 4638 |
|                      | 1 per month           | 41             | 0.31          | 0.12          | 0.36 | 1.1               | 1623 | 1.2               | 12.6 | 1.1  | 3.2  | 4815 |
|                      | 2–3 per month         | 89             | 0.31          | 0.11          | 0.39 | 1.1               | 1613 | 1.1               | 12.7 | 1.0  | 3.4  | 4776 |
|                      | 1 per week            | 32             | 0.32          | 0.14          | 0.36 | 1.1               | 1489 | 1.2               | 11.5 | 0.94 | 3.3  | 4698 |
|                      | 2 per week            | 29             | 0.31          | 0.13          | 0.38 | 1.2               | 1571 | 1.2               | 11.6 | 1.0  | 3.3  | 4681 |
|                      | 3–4 per week and more | 26             | 0.31          | 0.14          | 0.43 | 1.0               | 1669 | 1.1               | 11.9 | 1.2  | 3.2  | 4628 |
| P value <sup>b</sup> |                       |                | 0.16          | <b>0.02**</b> | 0.27 | 0.35              | 0.78 | 0.26              | 0.26 | 0.80 | 0.76 | 0.69 |
| fish                 | Never                 | 51             | 0.29          | 0.11          | 0.40 | 1.0               | 1635 | 0.9               | 12.5 | 1.0  | 3.3  | 4856 |
|                      | <1 per month          | 46             | 0.35          | 0.12          | 0.38 | 1.0               | 1596 | 1.1               | 12.3 | 1.1  | 3.4  | 4726 |
|                      | 1 per month           | 62             | 0.30          | 0.13          | 0.38 | 1.1               | 1667 | 1.2               | 12.7 | 1.0  | 3.3  | 4780 |
|                      | 2–3 per month         | 69             | 0.32          | 0.12          | 0.36 | 1.1               | 1547 | 1.3               | 11.6 | 1.0  | 3.1  | 4561 |
|                      | 1 per week            | 14             | 0.43          | 0.12          | 0.35 | 1.2               | 1525 | 1.3               | 12.6 | 1.0  | 3.4  | 4717 |
|                      | 3–4 per week and more | 18             | 0.43          | 0.11          | 0.45 | 1.4               | 1514 | 1.4               | 13.5 | 0.94 | 3.8  | 4925 |
| P value <sup>b</sup> |                       |                | <b>0.02**</b> | 0.54          | 0.71 | <b>&lt;0.01**</b> | 0.06 | <b>&lt;0.01**</b> | 0.91 | 0.20 | 0.73 | 0.60 |

840  
 841 <sup>a</sup> Results shown for food items with association detected; <sup>b</sup> p-values are from linear mixed effects models accounting for within-person correlations: \*\*P <0.05; <sup>c</sup>  
 842 n=505 for total number of participants in third visit;  
 843  
 844

845

846

847

848

849

850

851 Figure S1. SG-corrected urinary concentrations (ng/mL) of metal(loid)s by study visit (n=1285)<sup>a</sup>.

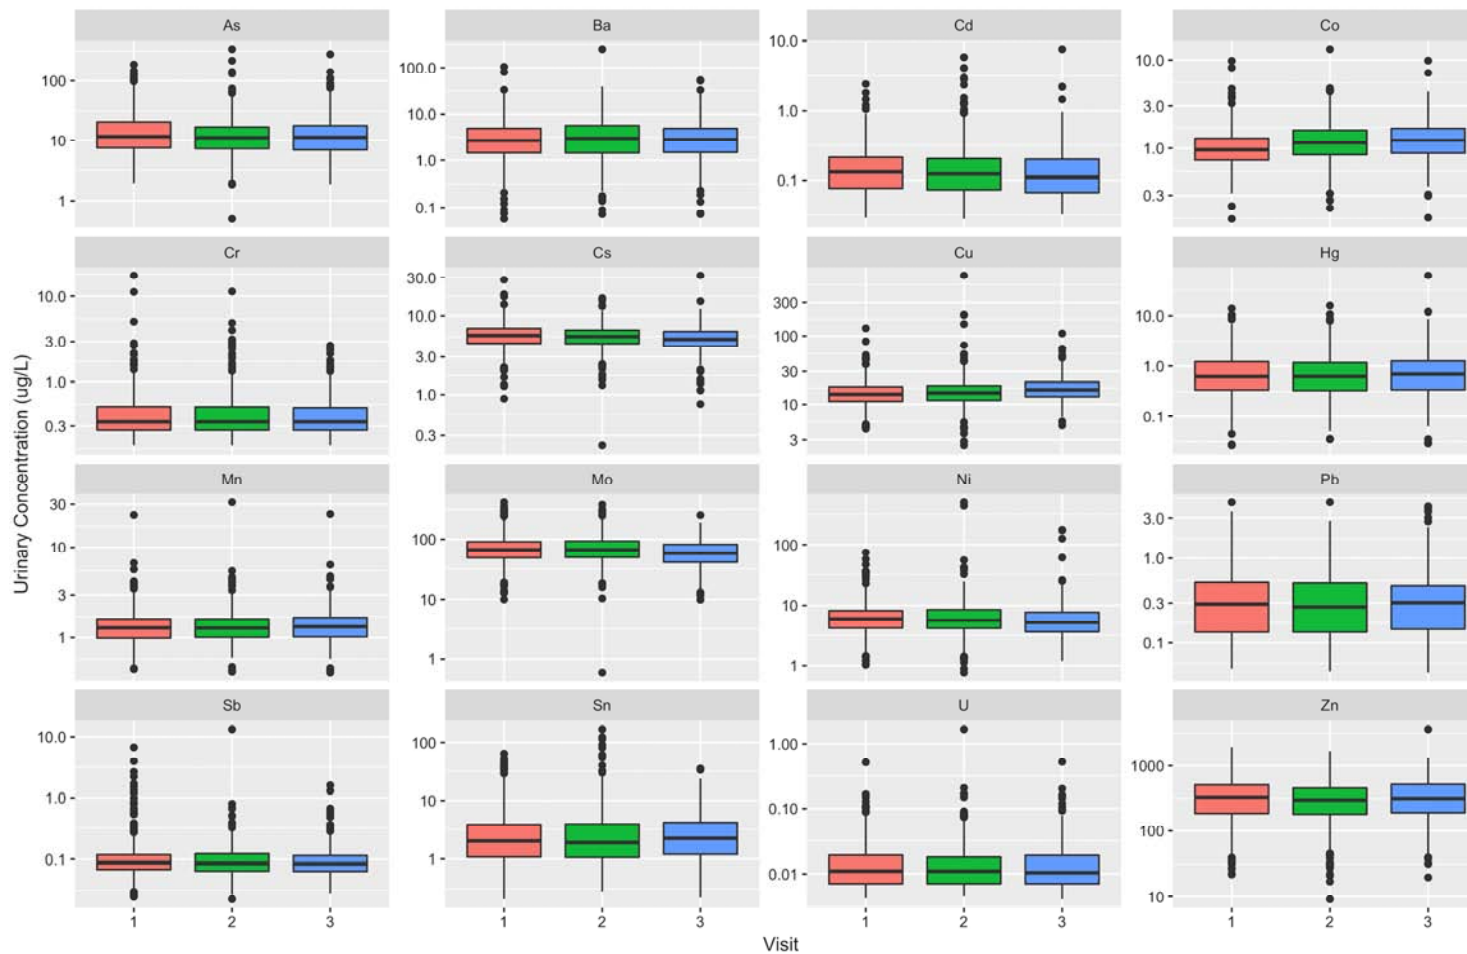

852

853 <sup>a</sup>Number of participants in each visit were 500, 449, and 336 respectively.

854

855

856

857 Figure S2. Blood concentrations(ng/mL) of metal(loid)s by study visit (n=1183)<sup>a</sup>.

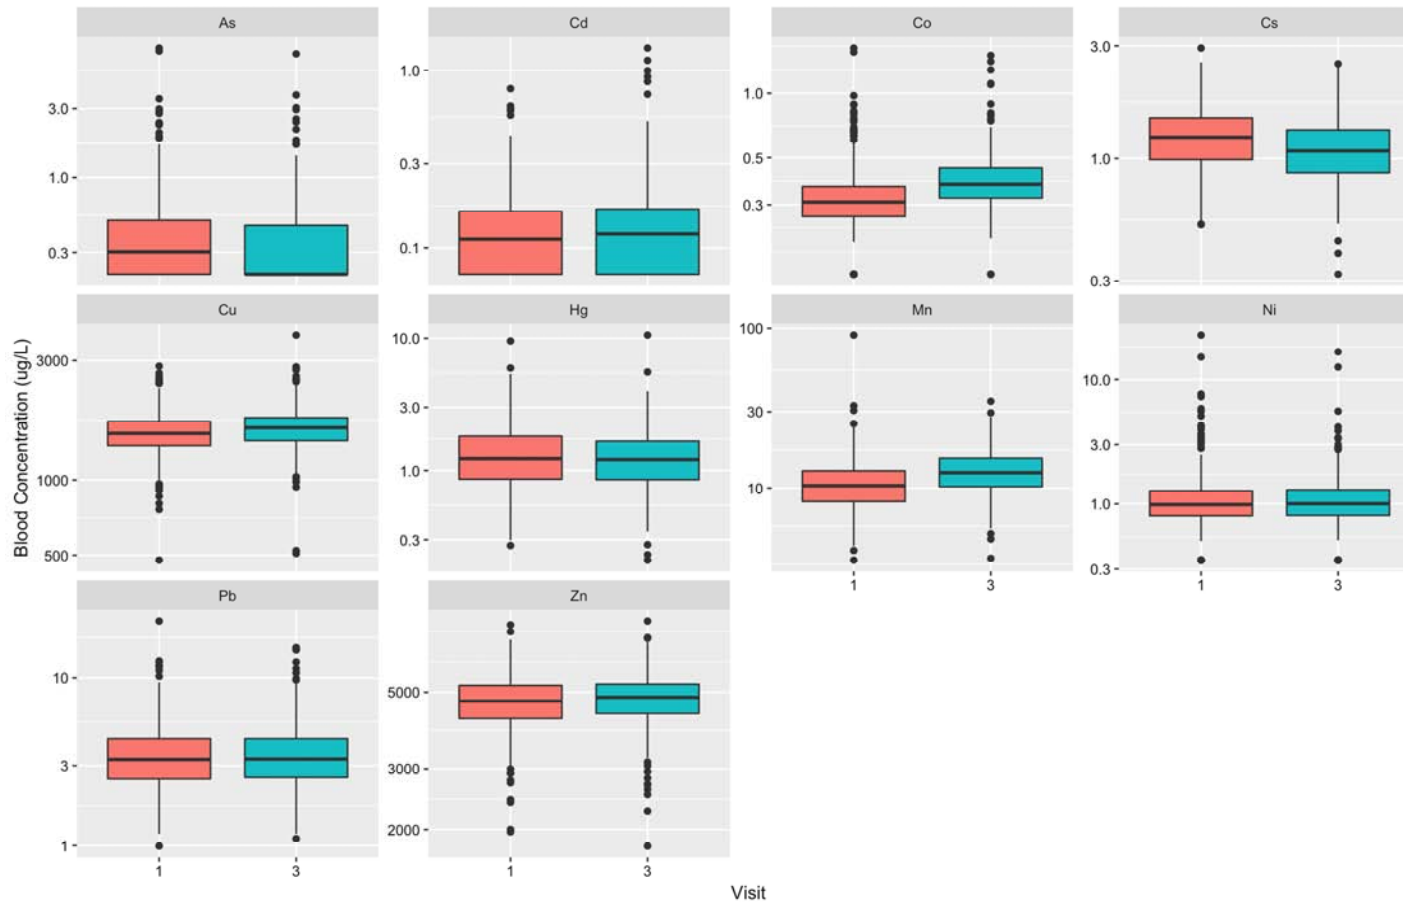

858

859 <sup>a</sup>Number of participants in 1<sup>st</sup> and 3<sup>rd</sup> visits were 678 and 505, respectively.

860

861

862

863

864 Figure S3. Urine/blood ratio distribution by study visit (n=509)<sup>a</sup>.

865

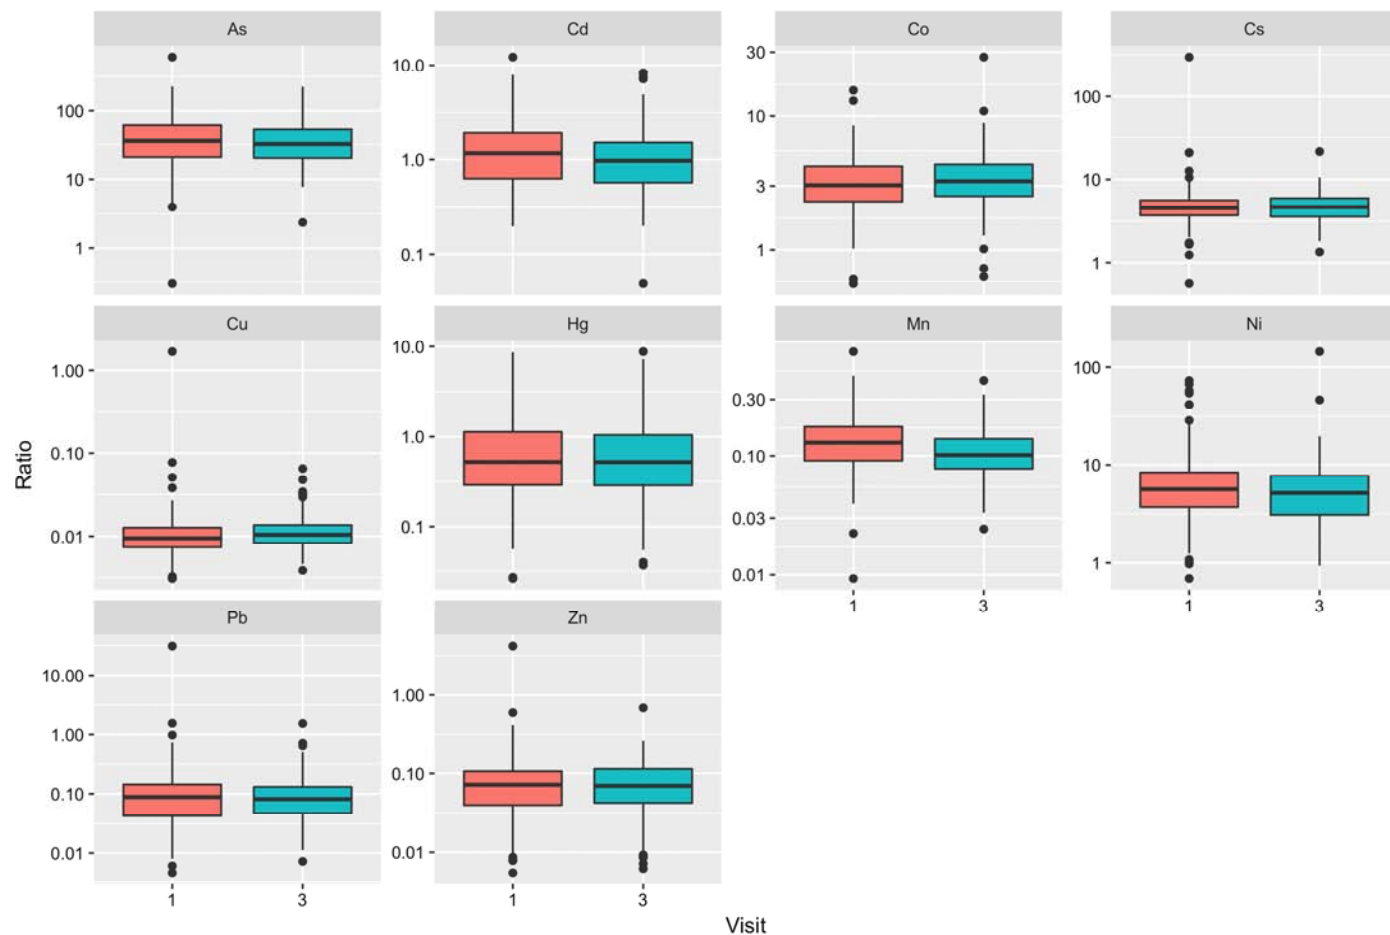

866

867

<sup>a</sup> Number of participants in 1<sup>st</sup> and 3<sup>rd</sup> visits were 309 and 200, respectively.

868

869

870

871

872

873

874



875  
876

Figure S4. Distribution of urinary biomarker concentrations (ng/mL) among 660 pregnant women in Puerto Rico over study years (2011–2017)<sup>ab</sup>.

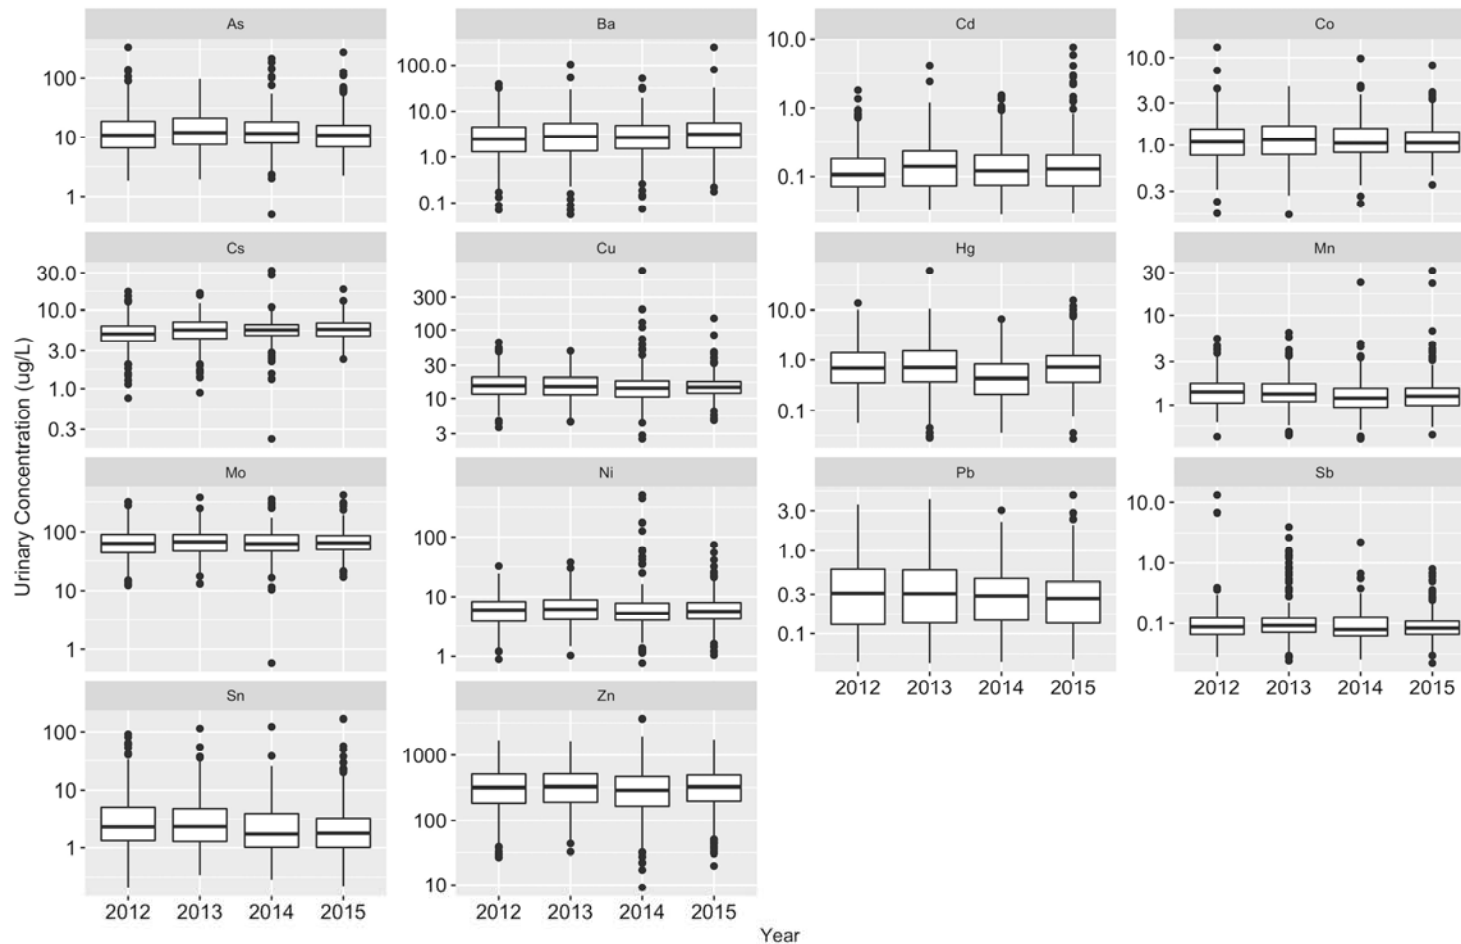

877  
878  
879  
880

<sup>a</sup> 2011 and 2012, 2015 and 2016 are combined to have even numbers of samples in each box; <sup>b</sup> Number of participants in each year during 2011–2012, 2013, 2014, 2015–2016 were 302, 273, 196, and 434, respectively.

881  
882  
883

884  
885

Figure S5. Distribution of blood biomarker concentrations (ng/mL) among 842 pregnant women in Puerto Rico over study years (2011–2017)<sup>ab</sup>.

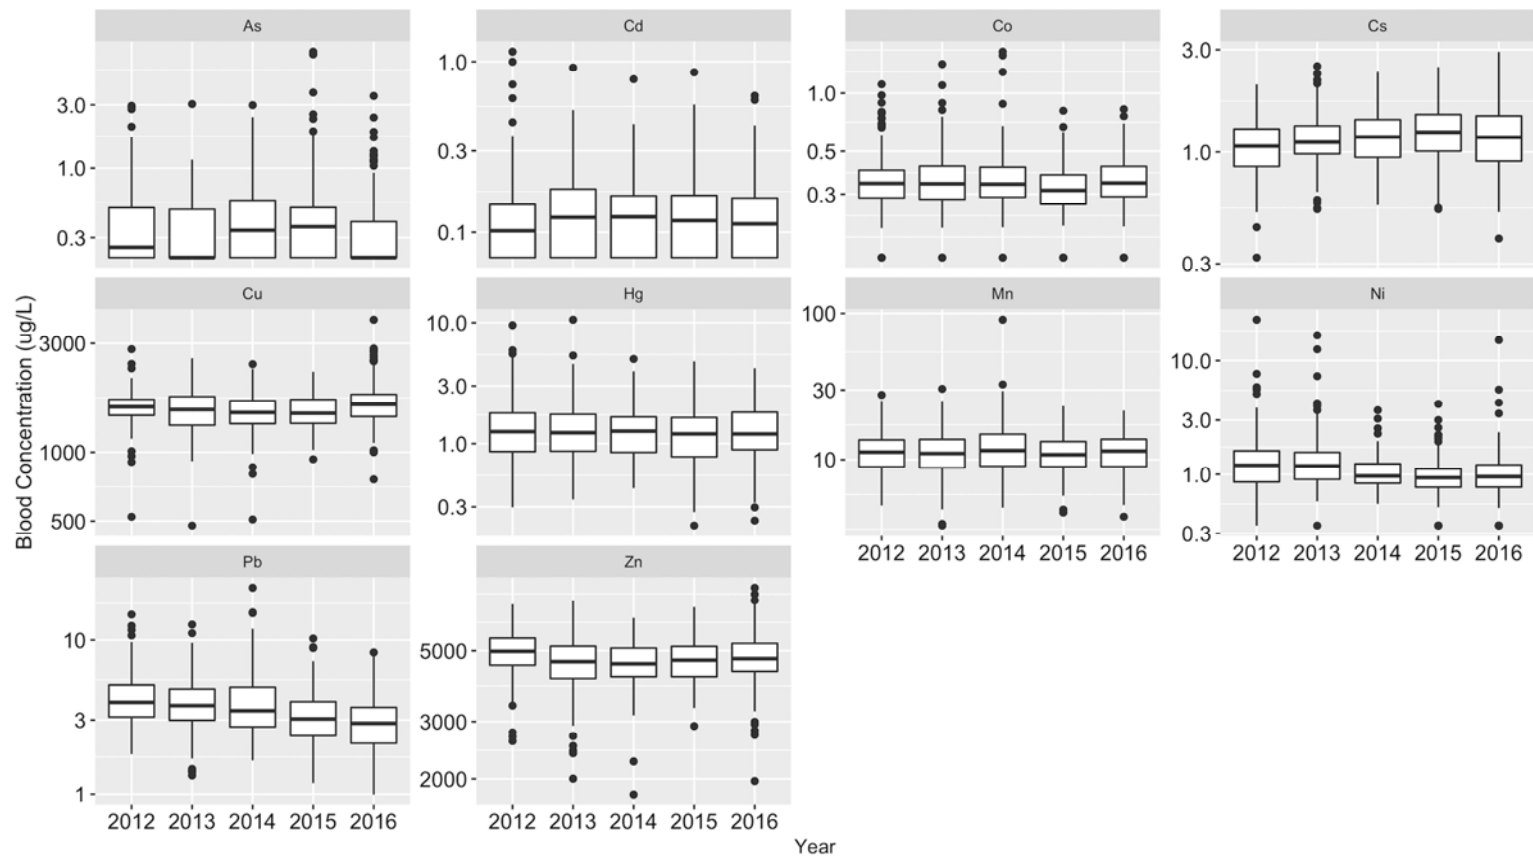

886  
887  
888  
889  
890

<sup>a</sup> 2011 and 2012, 2016 and 2017 are combined to obtain a balanced number of samples in each box; <sup>b</sup> Number of participants in each year during 2011–2012, 2013, 2014, 2015, and 2016–2017 were 212, 148, 147, 249, and 274, respectively.

891

892
